# Supplementary material for: Plasmonic Cu-supported amorphous RuP for efficient photothermal CO2 hydrogenation to CO
Source: Royal Society of Chemistry journal article supplement (doi:10.1039/d4ra07361d), 2025-01-01
Supplement: d4ra07361d1.pdf [file d4ra07361d1.pdf]

## **Supplementary Information (SI)**

**Tab. S1.** The textural properties of different catalysts were calculated from N<sub>2</sub> adsorption-desorption isotherms.

| Catalyst  | BET surface area (m <sup>2</sup> g <sup>-1</sup> ) | Pore diameter (nm) | Pore volume (cm <sup>3</sup> g <sup>-1</sup> ) |
|-----------|----------------------------------------------------|--------------------|------------------------------------------------|
| RuP       | 1.82                                               | 5.33               | 0.02                                           |
| Cu        | 29.71                                              | 21.80              | 0.16                                           |
| 4% RuP/Cu | 19.83                                              | 13.59              | 0.07                                           |

---

**Tab. S2.** The CO productivity of different reaction conditions of 4% RuP/Cu.

| Reaction conditions           | CO productivity (mmol/g/h) |
|-------------------------------|----------------------------|
| H <sub>2</sub> atmosphere     | 1.65                       |
| CO <sub>2</sub> atmosphere    | Trace                      |
| Ar atmosphere                 | Trace                      |
| Quarta sand, without catalyst | Trace                      |

(Unless otherwise stated, the reaction condition was fixed: 20 mg catalyst, 300°C reaction temperature, 500 mW/cm<sup>2</sup> light intensity, 50 mL/min flow rate, the stoichiometric ratio of CO<sub>2</sub>:H<sub>2</sub> is 4:1, and 1 h reaction period.)

---

**Tab. S3** the ICP-OES results of different catalysts.

---

| Catalyst | Concentration of Ru<br>(mg/L) | Concentration of Cu<br>(mg/L) | Theoretical<br>mass ratio | Actual mass<br>ratio |
|----------|-------------------------------|-------------------------------|---------------------------|----------------------|
| 2%RuP/Cu | 0.93                          | 48.95                         | 0.02                      | 0.019                |
| 4%RuP/Cu | 1.77                          | 47.84                         | 0.04                      | 0.037                |
| 6%RuP/Cu | 2.81                          | 51.09                         | 0.06                      | 0.055                |
| 8%RuP/Cu | 3.96                          | 53.50                         | 0.08                      | 0.074                |

---

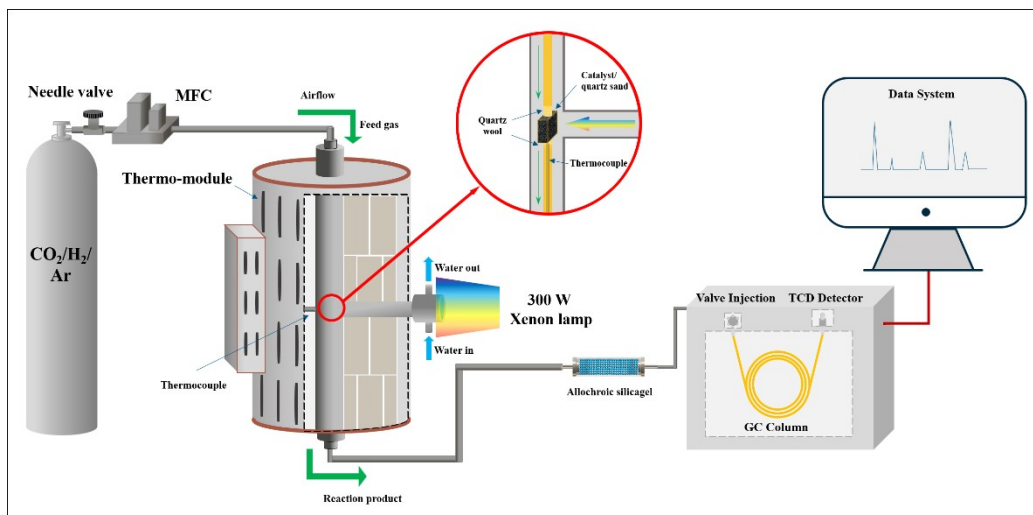

Fig. S1 Schematic diagram of the photothermal device.

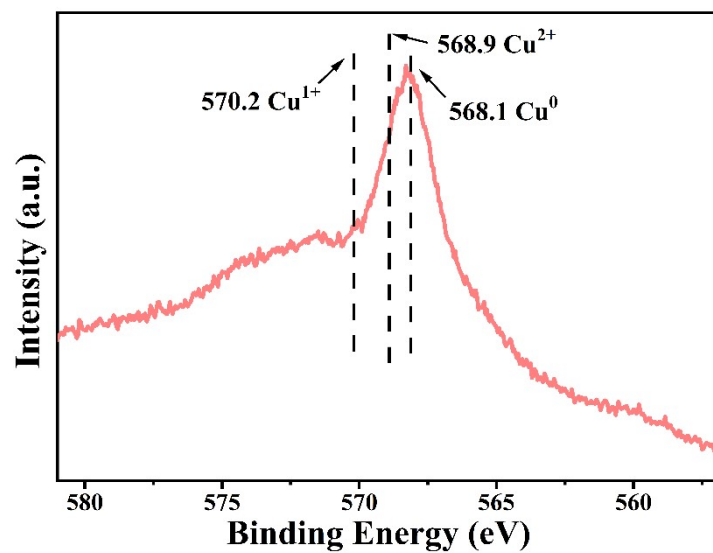

Fig. S2 XPS spectra of the Cu LMM of 4% RuP/Cu.

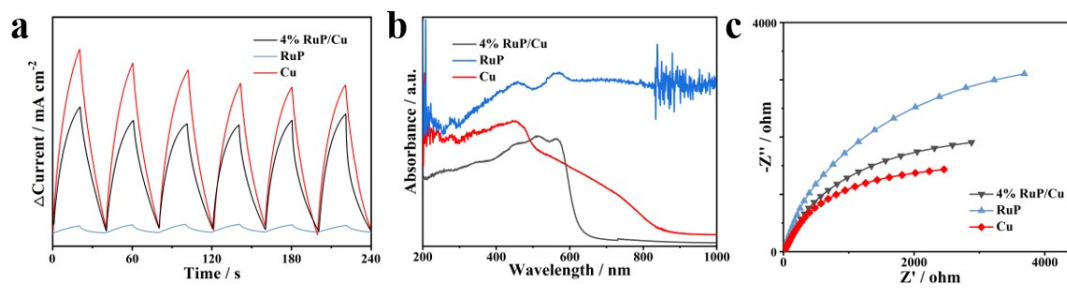

Fig. S3 (a) Transient photocurrent responses. (b) UV-Vis diffuse reflectance spectra. (c) Electrochemical impedance spectroscopy (EIS) analysis.

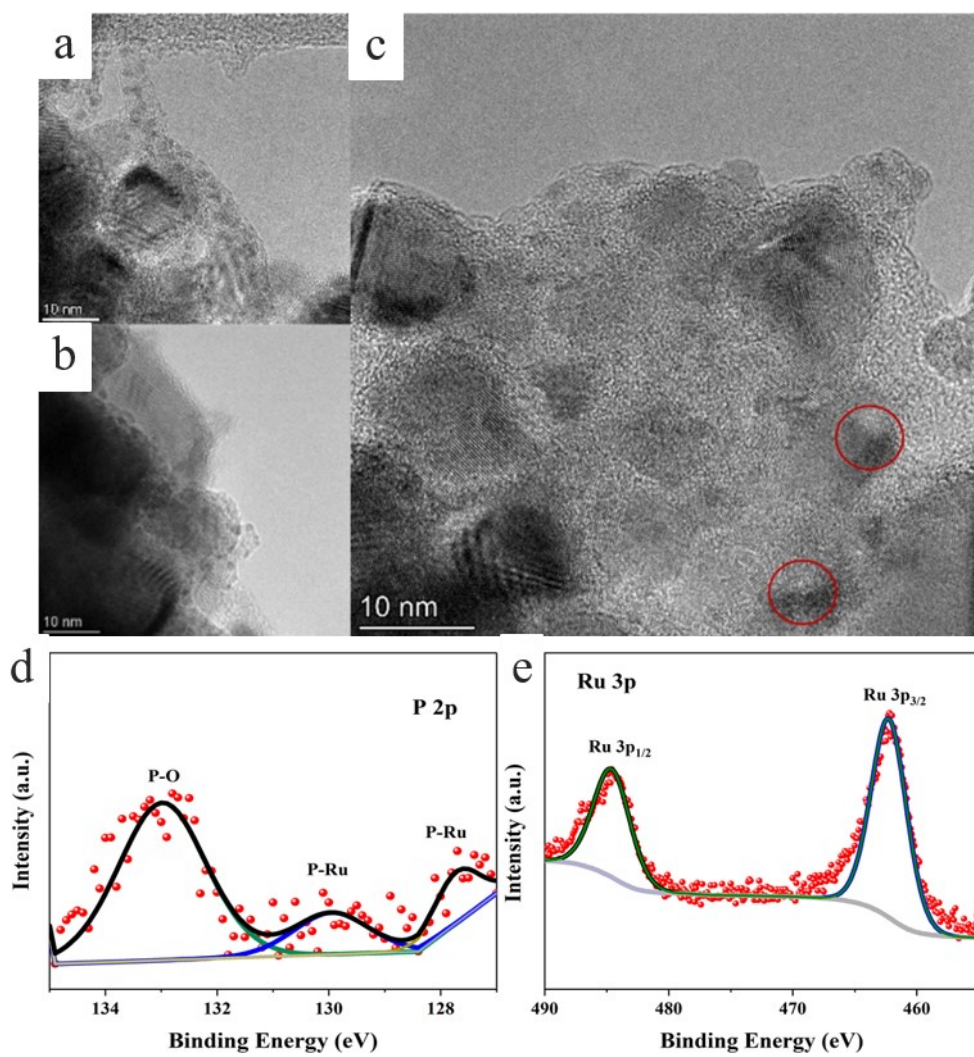

**Fig. S4.** TEM of 4%RuP/Cu after reaction (a-c), and XPS of 4% RuP/Cu after reaction (d) P 2p and (e) Ru 3p.
